# Supplementary material for: Dynamic observation of manganese adatom mobility at perovskite oxide catalyst interfaces with water
Source: Springer Nature journal article supplement (doi:10.1038/s43246-020-00070-6), 2020-09-24
Supplement: MOESM2 [file 43246_2020_70_MOESM2_ESM.pdf]

## Description of Additional Supplementary Files

File Name: Supplementary Movie 1

Description: LSMO (001) surface in 0.5 Pa H<sub>2</sub>O. Observation of a high Mn adatom mobility on flat A-terminated (001) surfaces due to partial solvation in H<sub>2</sub>O. Frame rate is 4.4 fps.

File Name: Supplementary Movie 2

Description: LSMO (001) surface with a step in 0.5 Pa H<sub>2</sub>O. Observation of a reduced Mn adatom mobility due to Ehrlich-Schwöbel barrier at a step edge on the (001) surface. Frame rate is 4.4 fps.

File Name: Supplementary Movie 3

Description: LSMO (001) surface in high vacuum (10<sup>-5</sup> Pa). Observation of the (001) surface with mixed A- and B-termination shows a reduced Mn mobility compared to H<sub>2</sub>O. Frame rate is 4.4 fps.

File Name: Supplementary Movie 4

Description: LSMO (001) surface in 100 Pa O<sub>2</sub>. Highly ordered (001) A-terminated surface with a step edge and reduced adatom mobility compared to H<sub>2</sub>O. Frame rate is 4.4 fps.

File Name: Supplementary Movie 5

Description: LSMO (001) surface in 10 Pa N<sub>2</sub>. Ordered B-terminated (001) surface that shows a reduced Mn adatom mobility compared to H<sub>2</sub>O. Frame rate is 4.4 fps.

File Name: Supplementary Movie 6

Description: PCMO (001) surface in 0.5 Pa H<sub>2</sub>O. Ordered PCMO (001) surface that shows irreversible Mn dynamics with a pronounced leaching of Mn out of the surface and the formation of a Pr-rich bilayer. Frame rate is 4.4 fps.

File Name: Supplementary Movie 7

Description: PCMO surface close to (001) in high vacuum (10<sup>-5</sup> Pa). Disordered PCMO surface close to (001) typically observed in high vacuum, where leaching of Mn is absent. Frame rate is 4.4 fps.

File Name: Supplementary Movie 8.

Description: PCMO surface in 100 Pa O<sub>2</sub>. Highly ordered surface with (001) facets and mixed termination, where leaching of Mn is absent. Frame rate is 4.4 fps.

File Name: Supplementary Movie 9.

Description: Preparation of ordered LSMO (001) surfaces in 100 Pa O<sub>2</sub>. Initial state of the LSMO surface after ion milling before recrystallization in O<sub>2</sub>. Frame rate is 4.4 fps.

File Name: Supplementary Movie 10.

Description: Preparation of ordered LSMO (001) surfaces in 100 Pa O<sub>2</sub>. Final state of surface recrystallization in O<sub>2</sub>. Frame rate is 4.4 fps.
